# Supplementary material
Source: publisher figshare collection journal article supplement (https://karger.figshare.com/ndownloader/files/26150645)
Supplement: Supplementary file 1 [file 26150645]

Supple 3 Percentage of mortality in infants born at < 37 weeks with trisomy 18 syndrome (1995-2016) (n = 3220)
